# Supplementary material for: Survival Analysis of 1140 Patients with Biliary Cancer and Benefit from Concurrent Renin-Angiotensin Antagonists, Statins, or Aspirin with Systemic Therapy
Source: PubMed Central journal article supplement — Oncologist. 2023 Apr 10;28(6):531–41. doi: 10.1093/oncolo/oyad063 (PMC10243793; doi:10.1093/oncolo/oyad063), 2023-04-10
Supplement: oyad063_suppl_supplementary_tables.pdf [file oyad063_suppl_supplementary_tables.pdf]

**Supplementary Table 1. Patient characteristics of concurrent medication cohort by BTC subtype**

| Characteristic                             | Total (N=509) | IHCCA (N=298) | HCCA (N=79) | DCCA (N=27) | GBCA (N=97) | CCA-HCC (N=8) | P-value <sup>†</sup> |
|--------------------------------------------|---------------|---------------|-------------|-------------|-------------|---------------|----------------------|
| Median age, years (range)                  | 62 (20-86)    | 62 (20-86)    | 63 (28-81)  | 63 (33-79)  | 64 (32-83)  | 59 (21-64)    | 0.27                 |
| Gender (F, M)                              | 240, 269      | 131, 167      | 36, 43      | 8, 19       | 60, 37      | 5, 3          | 0.01                 |
| Race                                       |               |               |             |             |             |               | 0.62                 |
| African American                           | 35            | 20            | 4           | 0           | 11          | 0             |                      |
| Asian                                      | 7             | 5             | 1           | 0           | 1           | 0             |                      |
| Caucasian                                  | 436           | 257           | 70          | 25          | 76          | 8             |                      |
| Other/Unknown                              | 31            | 16            | 4           | 2           | 9           | 0             |                      |
| Ethnicity                                  |               |               |             |             |             |               | 0.61                 |
| Hispanic                                   | 11            | 8             | 1           | 0           | 2           | 0             |                      |
| Non-Hispanic                               | 461           | 266           | 75          | 23          | 90          | 7             |                      |
| Unknown                                    | 37            | 24            | 3           | 4           | 5           | 1             |                      |
| Stage at Diagnosis                         |               |               |             |             |             |               | <0.0001              |
| Resectable                                 | 80            | 45            | 7           | 11          | 17          | 0             |                      |
| Locally Advanced                           | 141           | 66            | 40          | 12          | 21          | 2             |                      |
| Metastatic                                 | 288           | 187           | 32          | 4           | 59          | 6             |                      |
| Resected                                   |               |               |             |             |             |               | 0.02                 |
| Yes                                        | 115           | 61            | 21          | 12          | 21          | 0             |                      |
| No                                         | 394           | 237           | 58          | 15          | 76          | 8             |                      |
| Stage at First-Line Systemic Therapy Start |               |               |             |             |             |               | <0.0001              |
| Locally Advanced                           | 132           | 56            | 41          | 12          | 21          | 2             |                      |
| Metastatic                                 | 297           | 195           | 32          | 4           | 60          | 6             |                      |
| Recurrent                                  | 80            | 47            | 6           | 11          | 16          | 0             |                      |
| Comorbidities*                             |               |               |             |             |             |               |                      |
| CVD                                        | 187           | 104           | 31          | 14          | 36          | 2             | 0.44                 |
| Diabetes                                   | 120           | 68            | 16          | 7           | 28          | 1             | 0.61                 |
| Dyslipidemia                               | 131           | 72            | 24          | 10          | 23          | 2             | 0.51                 |
| CKD                                        | 65            | 34            | 9           | 3           | 17          | 2             | 0.44                 |
| Hypertension                               | 308           | 183           | 44          | 20          | 55          | 6             | 0.37                 |
| Concurrent Medication*                     |               |               |             |             |             |               |                      |
| ACE-inhibitor                              | 106           | 62            | 16          | 5           | 20          | 3             | 0.83                 |
| ARB                                        | 49            | 33            | 3           | 3           | 10          | 0             | 0.31                 |
| ACE-I/ARB                                  | 152           | 92            | 19          | 8           | 30          | 3             | 0.79                 |
| Statin                                     | 111           | 55            | 21          | 6           | 27          | 2             | 0.27                 |
| Aspirin                                    | 109           | 65            | 18          | 7           | 17          | 2             | 0.85                 |
| One or more                                | 245           | 148           | 34          | 14          | 45          | 4             | 0.85                 |
| First-Line Systemic Therapy Included*      |               |               |             |             |             |               |                      |
| Gemcitabine                                | 417           | 246           | 63          | 22          | 78          | 8             | 0.69                 |
| Fluoropyrimidine                           | 103           | 58            | 19          | 8           | 18          | 0             | 0.34                 |
| Platinum                                   | 393           | 233           | 58          | 15          | 79          | 8             | 0.02                 |
| Immunotherapy                              | 34            | 21            | 4           | 0           | 8           | 1             | 0.83                 |
| Other                                      | 52            | 37            | 6           | 3           | 6           | 0             | 0.53                 |

\*Groups are not mutually exclusive and should not necessarily sum to the row or column total. <sup>†</sup>P-value compares biliary tract cancer subtypes, thereby describing variation between BTC subtypes.

ACE-I, angiotensin-converting enzyme inhibitor; ARB, angiotensin II receptor blocker; BTC, biliary tract cancer; CCA-HCC, mixed cholangiocarcinoma and hepatocellular carcinoma; CKD, chronic kidney disease; CVD, cardiovascular disease; DCCA, distal cholangiocarcinoma; HCCA, hilar cholangiocarcinoma; IHCCA, intrahepatic cholangiocarcinoma; GBCA, gallbladder carcinoma.

**Supplementary Table 2. Univariate analysis of variables predicting PFS and OS in BTC and anatomic subtypes**

**Supplementary Table 2. Univariate analyses of variables predicting PFS and OS in BTC and anatomic subtypes**

| Characteristic                             | BTC (N=509)      |         |                  |         | IHCCA (N=298)    |         |                  |         | HCCA (N=79)         |         |                   |         | DCCA (N=27)       |         |                   |         | GBC (N=97)          |         |                  |         |
|--------------------------------------------|------------------|---------|------------------|---------|------------------|---------|------------------|---------|---------------------|---------|-------------------|---------|-------------------|---------|-------------------|---------|---------------------|---------|------------------|---------|
|                                            | PFS              |         | OS               |         | PFS              |         | OS               |         | PFS                 |         | OS                |         | PFS               |         | OS                |         | PFS                 |         | OS               |         |
|                                            | HR (95% CI)      | P-value | HR (95% CI)         | P-value | HR (95% CI)       | P-value | HR (95% CI)       | P-value | HR (95% CI)       | P-value | HR (95% CI)         | P-value | HR (95% CI)      | P-value |
| Age at diagnosis                           | 1.01 (1.00-1.02) | 0.24    | 1.01 (1.00-1.02) | 0.03    | 1.00 (0.99-1.01) | 0.67    | 1.02 (1.01-1.03) | 0.02    | 1.02 (0.99-1.05)    | 0.15    | 1.00 (0.98-1.02)  | 0.93    | 1.01 (0.97-1.04)  | 0.76    | 1.00 (0.97-1.03)  | 0.98    | 1.00 (0.98-1.02)    | 0.96    | 1.01 (0.99-1.03) | 0.38    |
| Gender (F)                                 | 0.89 (0.72-1.11) | 0.30    | 0.86 (0.71-1.03) | 0.10    | 0.75 (0.57-0.99) | 0.04    | 0.75 (0.59-0.96) | 0.03    | 1.21 (0.63-2.35)    | 0.56    | 0.76 (0.46-1.24)  | 0.27    | 2.20 (0.79-6.11)  | 0.13    | 0.99 (0.39-2.56)  | 0.99    | 1.15 (0.7-1.9)      | 0.58    | 1.26 (0.81-1.96) | 0.30    |
| Race                                       |                  |         |                  |         |                  |         |                  |         |                     |         |                   |         |                   |         |                   |         |                     |         |                  |         |
| African American                           | 1.05 (0.70-1.57) | 0.81    | 1.15 (0.80-1.64) | 0.45    | 0.84 (0.48-1.49) | 0.56    | 1.03 (0.64-1.64) | 0.81    | 2.73 (0.82-9.10)    | 0.10    | 8.40 (2.70-26.18) | 0.0002  | None              | None    | 0.97 (0.49-1.92)  | 0.93    | 0.93 (0.48-1.81)    | 0.83    |                  |         |
| Asian                                      | 1.51 (0.67-3.41) | 0.32    | 1.46 (0.69-3.09) | 0.32    | 2.25 (0.83-6.08) | 0.11    | 2.71 (1.11-6.62) | 0.03    | 0.48 (0.06-3.92)    | 0.49    | 0.85 (0.12-6.21)  | 0.88    | None              | None    | 9.64 (1.22-76.39) | 0.03    | 0.53 (0.07-3.84)    | 0.53    |                  |         |
| Caucasian                                  | Reference        |         | Reference        |         | Reference        |         | Reference        |         | Reference           |         | Reference         |         | Reference         |         | Reference         |         | Reference           |         |                  |         |
| Other/Unknown                              | 1.56 (0.98-2.49) | 0.06    | 0.93 (0.61-1.43) | 0.75    | 1.79 (0.97-3.30) | 0.06    | 1.11 (0.64-1.95) | 0.83    | 1.81 (0.43-7.69)    | 0.42    | 2.19 (0.67-7.17)  | 0.19    | 2.05 (0.46-9.24)  | 0.35    | 0.58 (0.08-4.37)  | 0.60    | 0.91 (0.33-2.53)    | 0.85    | 0.50 (0.20-1.23) | 0.13    |
| Ethnicity                                  |                  |         |                  |         |                  |         |                  |         |                     |         |                   |         |                   |         |                   |         |                     |         |                  |         |
| Hispanic                                   | 1.09 (0.54-2.21) | 0.80    | 0.87 (0.45-1.68) | 0.68    | 0.85 (0.38-1.93) | 0.70    | 1.22 (0.60-2.48) | 0.65    | 17.44 (1.95-156.05) | 0.01    | 1.76 (0.24-12.91) | 0.58    | None              | None    | 1.65 (0.23-12.06) | 0.62    | Unable to calculate | 0.98    |                  |         |
| Non-Hispanic                               | Reference        |         | Reference        |         | Reference        |         | Reference        |         | Reference           |         | Reference         |         | Reference         |         | Reference         |         | Reference           |         |                  |         |
| Unknown                                    | 1.20 (0.77-1.87) | 0.42    | 1.22 (0.84-1.75) | 0.30    | 1.06 (0.63-1.80) | 0.83    | 0.97 (0.62-1.52) | 0.70    | Unable to calculate | 0.99    | 1.51 (0.36-6.27)  | 0.57    | 1.65 (0.53-5.14)  | 0.39    | 1.47 (0.41-5.31)  | 0.56    | 1.59 (0.38-6.72)    | 0.53    | 3.31 (1.17-9.42) | 0.02    |
| Type of Cancer                             |                  |         |                  |         |                  |         |                  |         |                     |         |                   |         |                   |         |                   |         |                     |         |                  |         |
| IHCCA                                      | Reference        |         | Reference        |         | Not applicable   |         | Not applicable   |         | Not applicable      |         | Not applicable    |         | Not applicable    |         | Not applicable    |         | Not applicable      |         |                  |         |
| HCCA                                       | 0.59 (0.42-0.83) | 0.0027  | 0.75 (0.57-0.99) | 0.04    |                  |         |                  |         |                     |         |                   |         |                   |         |                   |         |                     |         |                  |         |
| DCCA                                       | 1.30 (0.82-2.06) | 0.26    | 1.20 (0.79-1.83) | 0.39    |                  |         |                  |         |                     |         |                   |         |                   |         |                   |         |                     |         |                  |         |
| GBC                                        | 1.04 (0.79-1.37) | 0.80    | 0.94 (0.74-1.20) | 0.64    |                  |         |                  |         |                     |         |                   |         |                   |         |                   |         |                     |         |                  |         |
| CCA-HCC                                    | 0.68 (0.22-2.13) | 0.51    | 0.78 (0.39-1.58) | 0.49    |                  |         |                  |         |                     |         |                   |         |                   |         |                   |         |                     |         |                  |         |
| Stage at Diagnosis                         |                  |         |                  |         |                  |         |                  |         |                     |         |                   |         |                   |         |                   |         |                     |         |                  |         |
| Resectable                                 | 1.01 (0.76-1.34) | 0.96    | 0.81 (0.62-1.06) | 0.12    | 0.90 (0.62-1.31) | 0.58    | 0.69 (0.48-0.98) | 0.02    | 0.85 (0.29-2.49)    | 0.76    | 0.89 (0.34-2.30)  | 0.80    | 2.97 (0.65-13.63) | 0.16    | 1.13 (0.32-3.99)  | 0.84    | 0.87 (0.47-1.60)    | 0.66    | 0.87 (0.49-1.55) | 0.64    |
| Locally Advanced                           | 0.50 (0.38-0.66) | <.0001  | 0.57 (0.46-0.71) | <.0001  | 0.58 (0.40-0.83) | 0.0026  | 0.63 (0.46-0.86) | 0.04    | 0.28 (0.13-0.59)    | 0.0008  | 0.33 (0.19-0.58)  | <.0001  | 0.67 (0.15-2.92)  | 0.59    | 0.55 (0.17-1.80)  | 0.32    | 0.53 (0.26-1.09)    | 0.08    | 0.70 (0.41-1.22) | 0.21    |
| Metastatic                                 | Reference        |         | Reference        |         | Reference        |         | Reference        |         | Reference           |         | Reference         |         | Reference         |         | Reference         |         | Reference           |         |                  |         |
| Resected                                   | 0.77 (0.59-1.01) | 0.06    | 0.59 (0.47-0.74) | <.0001  | 0.73 (0.51-1.03) | 0.08    | 0.54 (0.40-0.74) | 0.0001  | 0.32 (0.11-0.91)    | 0.03    | 0.38 (0.21-0.70)  | 0.002   | 3.38 (1.12-10.23) | 0.03    | 1.19 (0.51-2.78)  | 0.68    | 0.91 (0.50-1.66)    | 0.75    | 0.79 (0.47-1.32) | 0.37    |
| Stage at First-Line Systemic Therapy Start |                  |         |                  |         |                  |         |                  |         |                     |         |                   |         |                   |         |                   |         |                     |         |                  |         |
| Locally Advanced                           | 0.48 (0.36-0.64) | <.0001  | 0.56 (0.45-0.70) | <.0001  | 0.60 (0.41-0.89) | 0.01    | 0.64 (0.46-0.89) | 0.007   | 0.28 (0.13-0.59)    | 0.0008  | 0.33 (0.19-0.57)  | <.0001  | 0.67 (0.15-2.92)  | 0.59    | 0.55 (0.17-1.80)  | 0.32    | 0.41 (0.19-0.88)    | 0.02    | 0.65 (0.37-1.14) | 0.13    |
| Metastatic                                 | Reference        |         | Reference        |         | Reference        |         | Reference        |         | Reference           |         | Reference         |         | Reference         |         | Reference         |         | Reference           |         |                  |         |
| Recurrent                                  | 1.03 (0.78-1.36) | 0.83    | 0.83 (0.64-1.08) | 0.16    | 0.91 (0.63-1.30) | 0.59    | 0.70 (0.50-0.99) | 0.05    | 0.85 (0.29-2.49)    | 0.76    | 0.89 (0.34-2.32)  | 0.81    | 2.97 (0.65-13.63) | 0.16    | 1.13 (0.32-3.99)  | 0.84    | 1.01 (0.55-1.87)    | 0.97    | 0.91 (0.51-1.62) | 0.75    |
| Comorbidities                              |                  |         |                  |         |                  |         |                  |         |                     |         |                   |         |                   |         |                   |         |                     |         |                  |         |
| CVD                                        | 0.95 (0.76-1.18) | 0.61    | 1.09 (0.90-1.31) | 0.40    | 0.89 (0.67-1.18) | 0.41    | 1.03 (0.80-1.33) | 0.80    | 1.08 (0.56-2.10)    | 0.82    | 1.32 (0.81-2.16)  | 0.27    | 0.74 (0.30-1.84)  | 0.52    | 0.62 (0.26-1.49)  | 0.29    | 0.88 (0.52-1.47)    | 0.61    | 1.23 (0.79-1.91) | 0.36    |
| Diabetes                                   | 1.13 (0.88-1.44) | 0.33    | 1.02 (0.82-1.26) | 0.89    | 0.83 (0.60-1.15) | 0.26    | 1.02 (0.77-1.36) | 0.89    | 1.60 (0.74-3.43)    | 0.23    | 0.97 (0.52-1.81)  | 0.92    | 0.87 (0.30-2.52)  | 0.80    | 1.16 (0.44-3.03)  | 0.76    | 2.27 (1.33-3.89)    | 0.003   | 1.08 (0.68-1.73) | 0.74    |
| HLD                                        | 1.02 (0.80-1.30) | 0.87    | 1.19 (0.96-1.46) | 0.11    | 0.97 (0.70-1.32) | 0.82    | 1.13 (0.86-1.49) | 0.39    | 1.08 (0.53-2.20)    | 0.84    | 1.13 (0.67-1.91)  | 0.65    | 0.99 (0.38-2.56)  | 0.98    | 1.46 (0.60-3.54)  | 0.40    | 1.12 (0.66-1.93)    | 0.67    | 1.72 (1.03-2.87) | 0.04    |
| CKD                                        | 0.74 (0.53-1.03) | 0.07    | 0.79 (0.60-1.05) | 0.10    | 0.78 (0.51-1.20) | 0.26    | 0.83 (0.57-1.21) | 0.33    | 0.23 (0.05-0.95)    | 0.04    | 0.62 (0.28-1.37)  | 0.24    | 0.35 (0.05-2.64)  | 0.31    | 0.15 (0.02-1.12)  | 0.06    | 1.24 (0.67-2.27)    | 0.49    | 1.40 (0.80-2.45) | 0.25    |
| HTN                                        | 0.97 (0.78-1.21) | 0.78    | 1.08 (0.89-1.30) | 0.44    | 0.92 (0.69-1.22) | 0.56    | 0.92 (0.72-1.18) | 0.52    | 0.73 (0.38-1.42)    | 0.36    | 1.28 (0.78-2.09)  | 0.34    | 1.14 (0.40-3.26)  | 0.80    | 2.57 (0.84-7.83)  | 0.10    | 1.07 (0.66-1.75)    | 0.78    | 1.26 (0.81-1.94) | 0.31    |
| Concurrent Medication                      |                  |         |                  |         |                  |         |                  |         |                     |         |                   |         |                   |         |                   |         |                     |         |                  |         |
| ACE-inhibitor                              | 0.86 (0.66-1.12) | 0.26    | 0.99 (0.79-1.24) | 0.89    | 0.97 (0.70-1.34) | 0.83    | 0.91 (0.68-1.23) | 0.56    | 0.53 (0.22-1.27)    | 0.15    | 0.88 (0.48-1.63)  | 0.69    | 0.72 (0.21-2.48)  | 0.60    | 1.90 (0.67-5.35)  | 0.23    | 1.01 (0.57-1.8)     | 0.97    | 1.16 (0.69-1.95) | 0.57    |
| ARB                                        | 1.14 (0.80-1.64) | 0.47    | 1.28 (0.94-1.75) | 0.12    | 1.04 (0.67-1.62) | 0.87    | 1.25 (0.86-1.83) | 0.25    | 2.65 (0.62-11.28)   | 0.19    | 3.60 (1.09-11.91) | 0.04    | 0.52 (0.07-3.97)  | 0.53    | 0.28 (0.04-2.07)  | 0.21    | 1.14 (0.54-2.41)    | 0.73    | 1.40 (0.71-2.73) | 0.33    |
| ACE-I/ARB                                  | 0.93 (0.74-1.18) | 0.55    | 1.08 (0.88-1.31) | 0.48    | 0.99 (0.74-1.33) | 0.95    | 1.01 (0.78-1.31) | 0.94    | 0.68 (0.31-1.49)    | 0.33    | 1.07 (0.61-1.88)  | 0.82    | 0.61 (0.20-1.86)  | 0.38    | 0.95 (0.36-2.49)  | 0.91    | 1.07 (0.64-1.77)    | 0.80    | 1.30 (0.82-2.05) | 0.27    |
| Statin                                     | 1.08 (0.85-1.39) | 0.53    | 1.27 (1.02-1.58) | 0.04    | 1.04 (0.75-1.45) | 0.80    | 1.23 (0.90-1.67) | 0.19    | 1.15 (0.55-2.39)    | 0.72    | 1.63 (0.95-2.82)  | 0.08    | 0.54 (0.17-1.68)  | 0.29    | 1.60 (0.61-4.19)  | 0.34    | 1.20 (0.71-2.04)    | 0.49    | 1.17 (0.74-1.87) | 0.50    |
| Aspirin                                    | 1.17 (0.90-1.51) | 0.25    | 1.14 (0.91-1.43) | 0.25    | 1.14 (0.91-1.43) | 0.12    | 1.29 (0.94-1.78) | 0.12    | 1.02 (0.46-2.25)    | 0.96    | 1.13 (0.62-2.04)  | 0.70    | 0.57 (0.19-1.74)  | 0.32    | 0.95 (0.34-2.62)  | 0.91    | 1.36 (0.73-2.53)    | 0.33    | 1.26 (0.74-2.16) | 0.39    |
| One or more                                | 1.08 (0.87-1.33) | 0.51    | 1.14 (0.94-1.37) | 0.18    | 1.04 (0.79-1.37) | 0.77    | 1.08 (0.85-1.37) | 0.53    | 1.12 (0.58-2.17)    | 0.74    | 1.10 (0.67-1.80)  | 0.70    | 0.46 (0.17-1.24)  | 0.13    | 1.31 (0.55-3.14)  | 0.55    | 1.27 (0.78-2.06)    | 0.33    | 1.37 (0.89-2.11) | 0.15    |
| First-Line Systemic Therapy Included       |                  |         |                  |         |                  |         |                  |         |                     |         |                   |         |                   |         |                   |         |                     |         |                  |         |
| Gemcitabine                                | 0.73 (0.55-0.96) | 0.02    | 1.07 (0.84-1.36) | 0.61    | 0.64 (0.44-0.92) | 0.02    | 1.01 (0.73-1.38) | 0.97    | 1.41 (0.55-3.63)    | 0.48    | 1.35 (0.75-2.43)  | 0.32    | 0.20 (0.06-0.66)  | 0.01    | 0.20 (0.06-0.67)  | 0.01    | 0.85 (0.47-1.51)    | 0.57    | 1.16 (0.67-2.00) | 0.60    |
| Fluoropyrimidine                           | 0.88 (0.67-1.15) | 0.35    | 0.85 (0.67-1.07) | 0.16    | 1.01 (0.72-1.42) | 0.96    | 0.84 (0.62-1.15) | 0.28    | 0.45 (0.17-1.15)    | 0.09    | 0.78 (0.45-1.35)  | 0.37    | 2.71 (0.94-7.85)  | 0.07    | 4.01 (1.5-10.73)  | 0.01    | 0.71 (0.36-1.40)    | 0.33    | 0.67 (0.38-1.20) | 0.18    |
| Platinum                                   | 0.83 (0.65-1.06) | 0.13    | 0.96 (0.77-1.19) | 0.68    | 0.77 (0.57-1.06) | 0.11    | 0.78 (0.59-1.03) | 0.08    | 1.86 (0.81-4.26)    | 0.14    | 1.66 (0.92-2.99)  | 0.09    | 0.65 (0.26-1.60)  | 0.35    | 0.57 (0.25-1.29)  | 0.18    | 0.58 (0.32-1.08)    | 0.08    | 1.14 (0.65-1.99) | 0.66    |
| Immunotherapy                              | 1.18 (0.80-1.76) | 0.40    | 1.20 (0.83-1.73) | 0.33    | 1.05 (0.63-1.75) | 0.86    | 1.03 (0.65-1.65) | 0.90    | 1.78 (0.54-5.86)    | 0.34    | 2.93 (0.89-9.64)  | 0.08    | None              | None    | 1.49 (0.71-3.15)  | 0.30    | 1.31 (0.63-2.73)    | 0.47    |                  |         |
| Other                                      | 0.93 (0.66-1.32) | 0.70    | 0.82 (0.60-1.13) | 0.22    | 0.97 (0.64-1.46) | 0.88    | 0.75 (0.51-1.09) | 0.12    | 1.62 (0.63-4.20)    | 0.32    | 1.51 (0.46-4.90)  | 0.50    | 0.55 (0.07-4.21)  | 0.57    | 0.50 (0.11-2.23)  | 0.37    | 0.51 (0.18-1.41)    | 0.19    | 0.93 (0.40-2.13) | 0.86    |

ACE-I, angiotensin-converting enzyme inhibitor; ARB, angiotensin II receptor blocker; BTC, biliary tract cancer; CCA-HCC, mixed cholangiocarcinoma and hepatocellular carcinoma; CKD, chronic kidney disease; CVD, cardiovascular disease; DCCA, distal cholangiocarcinoma; HCCA, hilar cholangiocarcinoma; IHCCA, intrahepatic cholangiocarcinoma; GBC, gallbladder carcinoma.

**Supplementary Table 3. Factors predicting PFS and OS of patients who received one or more concurrent medication by BTC subtype (multivariate)**

| Characteristic                             | BTC<br>(N=509)   |         | IHCCA<br>(N=295)      |         | HCCA<br>(N=76)        |         | GBCA<br>(N=96)        |         |
|--------------------------------------------|------------------|---------|-----------------------|---------|-----------------------|---------|-----------------------|---------|
|                                            | HR (95% CI)      | P-value | HR (95% CI)           | P-value | HR (95% CI)           | P-value | HR (95% CI)           | P-value |
| <b>Progression-free Survival</b>           |                  |         |                       |         |                       |         |                       |         |
| Age                                        | 1.01 (1.00-1.02) | 0.05    | 1.01 (1.00-1.02)      | 0.16    | 1.06 (1.02-1.10)      | 0.0041  | 1.00 (0.98-1.03)      | 0.86    |
| Gender (F)                                 | 0.87 (0.70-1.09) | 0.23    | 0.75 (0.56-1.00)      | 0.05    | 0.74 (0.34-1.63)      | 0.45    | 1.07 (0.62-1.84)      | 0.80    |
| ≥1 Concurrent Med                          | 0.97 (0.76-1.25) | 0.82    | 1.03 (0.76-1.40)      | 0.86    | 0.87 (0.29-2.55)      | 0.79    | 0.86 (0.43-1.71)      | 0.67    |
| Stage at First-Line Systemic Therapy Start |                  |         |                       |         |                       |         |                       |         |
| Locally Advanced                           | 0.46 (0.34-0.63) | <.0001  | 0.58 (0.38-0.87)      | 0.01    | 0.17 (0.07-0.43)      | 0.0002  | 0.38 (0.17-0.85)      | 0.02    |
| Metastatic                                 | Reference        |         | Reference             |         | Reference             |         | Reference             |         |
| Recurrent                                  | 0.98 (0.73-1.30) | 0.86    | 0.88 (0.61-1.28)      | 0.52    | 0.68 (0.18-2.52)      | 0.56    | 1.14 (0.60-2.16)      | 0.69    |
| Comorbidities                              |                  |         |                       |         |                       |         |                       |         |
| CVD                                        | 0.84 (0.66-1.07) | 0.17    | 0.80 (0.59-1.09)      | 0.15    | 1.68 (0.70-4.04)      | 0.25    | 0.56 (0.30-1.07)      | 0.08    |
| Diabetes                                   | 1.18 (0.90-1.54) | 0.23    | 0.90 (0.63-1.29)      | 0.57    | 2.32 (0.87-6.20)      | 0.09    | 2.22 (1.18-4.17)      | 0.01    |
| HLD                                        | 1.15 (0.86-1.52) | 0.34    | 1.22 (0.85-1.75)      | 0.29    | 0.73 (0.28-1.92)      | 0.52    | 1.25 (0.64-2.47)      | 0.52    |
| CKD                                        | 0.76 (0.53-1.08) | 0.12    | 0.76 (0.48-1.21)      | 0.25    | 0.11 (0.02-0.67)      | 0.02    | 1.67 (0.79-3.50)      | 0.18    |
| Hypertension                               | 0.87 (0.67-1.12) | 0.28    | 0.84 (0.60-1.17)      | 0.29    | 0.60 (0.23-1.58)      | 0.30    | 1.07 (0.58-1.98)      | 0.82    |
| Type of Cancer                             |                  |         |                       |         |                       |         |                       |         |
| IHCCA                                      | Reference        |         | <i>Not applicable</i> |         | <i>Not applicable</i> |         | <i>Not applicable</i> |         |
| HCCA                                       | 0.77 (0.54-1.10) | 0.14    |                       |         |                       |         |                       |         |
| DCCA                                       | 1.67 (1.03-2.69) | 0.04    |                       |         |                       |         |                       |         |
| GBCA                                       | 1.02 (0.77-1.35) | 0.91    |                       |         |                       |         |                       |         |
| CCA-HCC                                    | 0.86 (0.27-2.73) | 0.80    |                       |         |                       |         |                       |         |
| <b>Overall Survival</b>                    |                  |         |                       |         |                       |         |                       |         |
| Age                                        | 1.01 (1.00-1.02) | <.0001  | 1.02 (1.01-1.04)      | 0.0002  | 1.02 (0.99-1.04)      | 0.20    | 1.00 (0.98-1.02)      | 0.99    |
| Gender (F)                                 | 0.88 (0.73-1.06) | 0.18    | 0.78 (0.61-1.00)      | 0.05    | 0.68 (0.40-1.17)      | 0.16    | 1.09 (0.68-1.73)      | 0.73    |
| ≥1 Concurrent Med                          | 1.04 (0.83-1.30) | 0.76    | 1.05 (0.79-1.39)      | 0.74    | 0.76 (0.39-1.47)      | 0.41    | 1.20 (0.66-2.16)      | 0.56    |
| Stage at First-Line Systemic Therapy Start |                  |         |                       |         |                       |         |                       |         |
| Locally Advanced                           | 0.52 (0.41-0.67) | <.0001  | 0.56 (0.40-0.79)      | 0.001   | 0.29 (0.16-0.54)      | <.0001  | 0.58 (0.32-1.06)      | 0.08    |
| Metastatic                                 | Reference        |         | Reference             |         | Reference             |         | Reference             |         |
| Recurrent                                  | 0.78 (0.59-1.01) | 0.06    | 0.68 (0.48-0.96)      | 0.03    | 0.62 (0.21-1.81)      | 0.38    | 0.85 (0.47-1.55)      | 0.59    |
| Comorbidities                              |                  |         |                       |         |                       |         |                       |         |
| CVD                                        | 0.99 (0.80-1.22) | 0.90    | 0.89 (0.67-1.17)      | 0.40    | 1.35 (0.72-2.52)      | 0.35    | 1.09 (0.67-1.79)      | 0.72    |
| Diabetes                                   | 0.95 (0.74-1.21) | 0.67    | 1.12 (0.82-1.54)      | 0.47    | 0.70 (0.33-1.50)      | 0.36    | 0.90 (0.52-1.57)      | 0.72    |
| HLD                                        | 1.29 (1.02-1.65) | 0.04    | 1.28 (0.94-1.75)      | 0.12    | 1.00 (0.50-1.98)      | 0.99    | 1.74 (0.95-3.20)      | 0.07    |
| CKD                                        | 0.73 (0.54-0.98) | 0.04    | 0.72 (0.48-1.07)      | 0.10    | 0.59 (0.25-1.42)      | 0.24    | 1.21 (0.66-2.22)      | 0.53    |
| Hypertension                               | 0.94 (0.75-1.18) | 0.57    | 0.69 (0.51-0.94)      | 0.02    | 1.42 (0.74-2.71)      | 0.29    | 0.99 (0.58-1.70)      | 0.97    |
| Type of Cancer                             |                  |         |                       |         |                       |         |                       |         |
| IHCCA                                      | Reference        |         | <i>Not applicable</i> |         | <i>Not applicable</i> |         | <i>Not applicable</i> |         |
| HCCA                                       | 0.92 (0.69-1.24) | 0.59    |                       |         |                       |         |                       |         |
| DCCA                                       | 1.51 (0.98-2.35) | 0.06    |                       |         |                       |         |                       |         |
| GBCA                                       | 0.94 (0.73-1.21) | 0.64    |                       |         |                       |         |                       |         |
| CCA-HCC                                    | 0.90 (0.44-1.83) | 0.77    |                       |         |                       |         |                       |         |

*ACE-I, angiotensin-converting enzyme inhibitor; ARB, angiotensin II receptor blocker; BTC, biliary tract cancer; CCA-HCC, mixed cholangiocarcinoma and hepatocellular carcinoma; CKD, chronic kidney disease; CVD, cardiovascular disease; DCCA, distal cholangiocarcinoma; HCCA, hilar cholangiocarcinoma; IHCCA, intrahepatic cholangiocarcinoma; GBCA, gallbladder carcinoma.*
